# Supplementary material for: Pre-Transplant Serum Leptin Levels and Relapse of Acute Myeloid Leukemia after Allogeneic Transplantation
Source: MDPI journal article supplement (doi:10.3390/ijms23042337), 2022-02-20
Supplement: s1 [file s1]

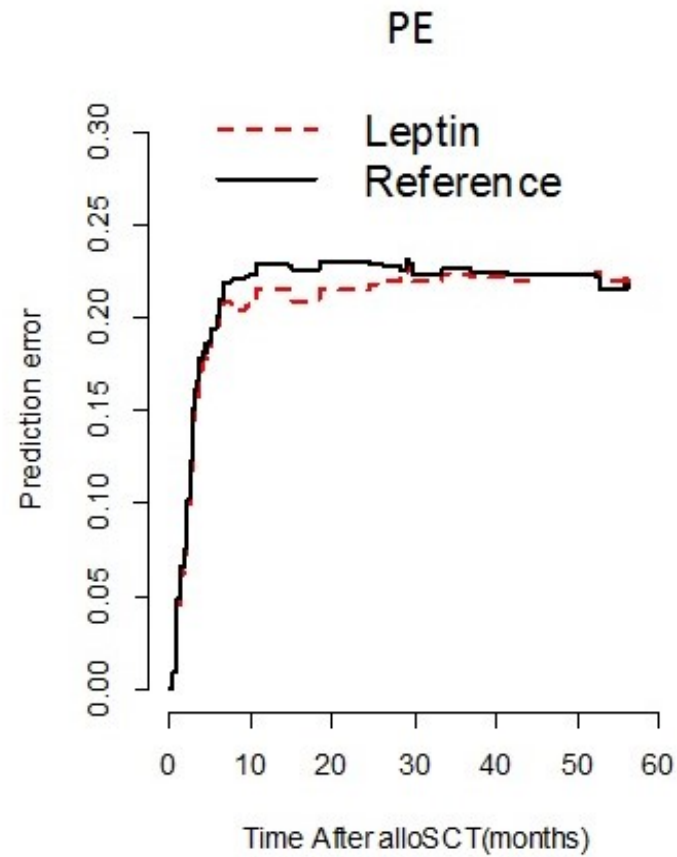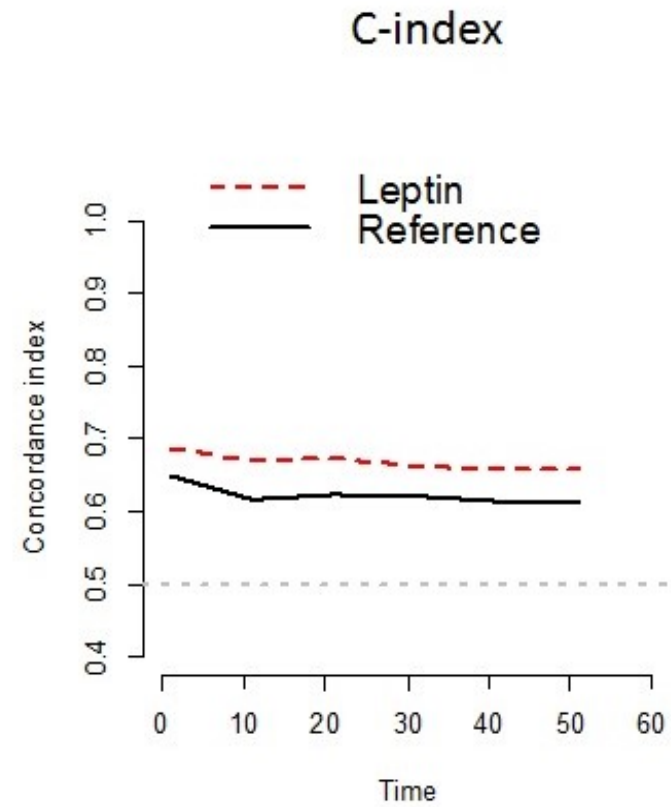

**Supplementary Figure S1.** Prediction error analysis and C-index of time to relapse (TTR) prediction in the multivariate model of Heidelberg intermediate/advanced stage Acute Leukaemia patients with and without (reference) consideration of Leptin

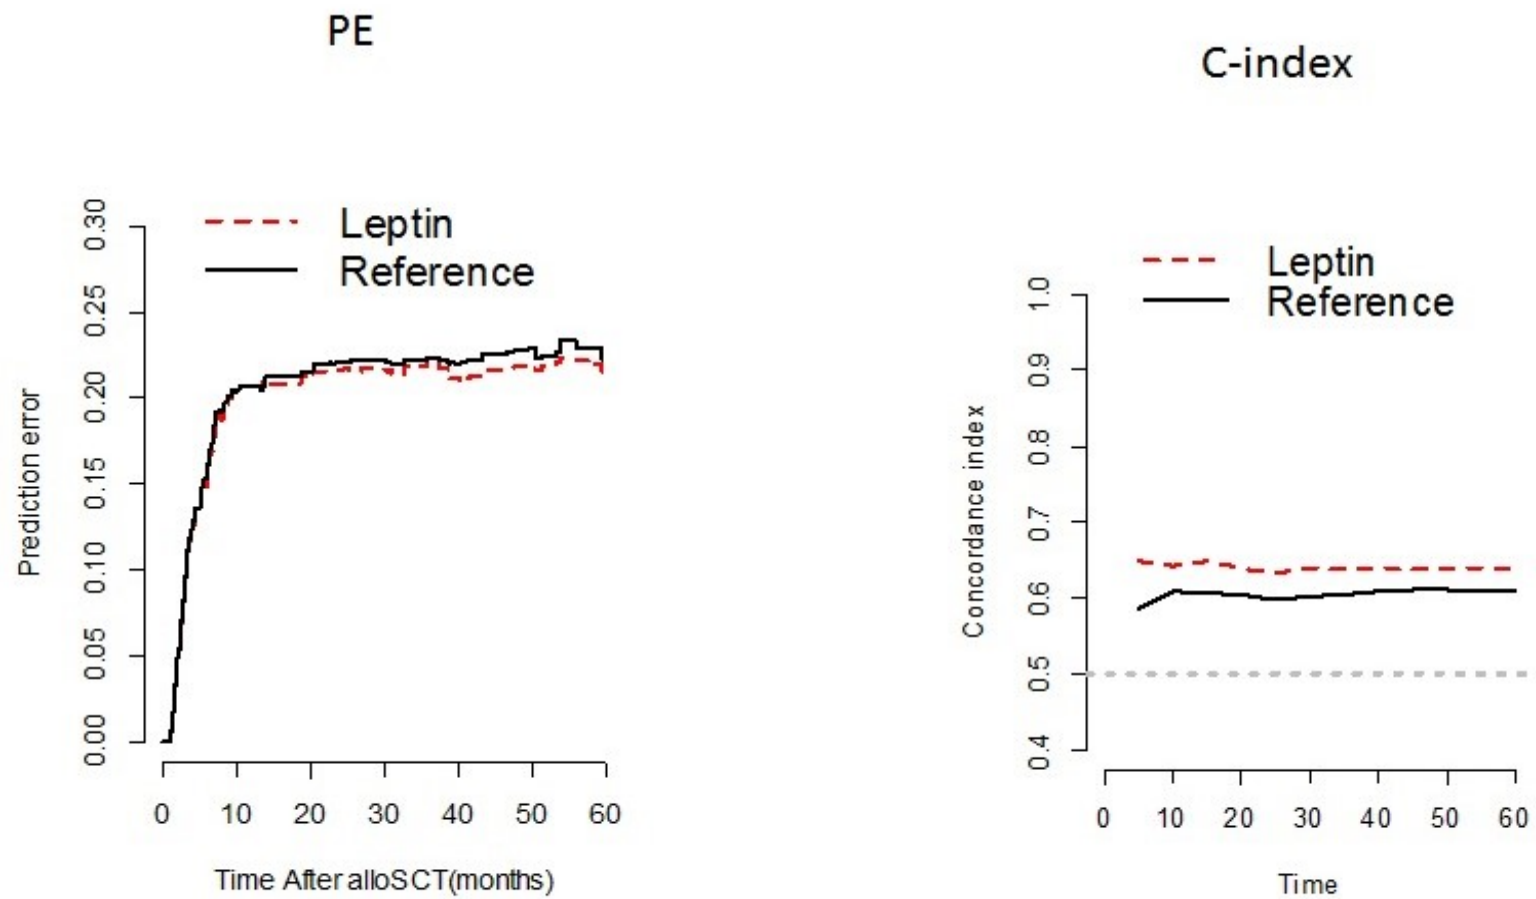

**Supplementary Figure S2.** Prediction error analysis and C-index of time to relapse (TTR) prediction in multivariate model of Essen intermediate/advanced stage AML patients with and without (reference) consideration of Leptin.

**Supplementary Table S1.** Multivariate Cox regression analysis with endpoint time to relapse (TTR) in the full Heidelberg cohort.

|                                           | HR (95% CI)        | P      | SIG |
|-------------------------------------------|--------------------|--------|-----|
| <b>Pre-conditioning Leptin (per log2)</b> | 0.91 (0.82 -1.00)  | 0.061  | .   |
| <b>Age at transplant (per 10 years)</b>   | 0.94 (0.83 -1.06)  | 0.326  |     |
| <b>Disease stage<sup>+</sup></b>          |                    |        |     |
| CR1                                       | Ref                | Ref    | *** |
| >CR1                                      | 3.09 (2.11- 4.53)  | <0.001 |     |
| <b>Disease entity</b>                     |                    |        |     |
| AML/ALL                                   | Ref                | Ref    | *** |
| Other                                     | 0.57 (0.41 -0.79)  | <0.001 |     |
| <b>HLA match</b>                          |                    |        |     |
| match (10/10)                             | Ref                | Ref    |     |
| mismatch                                  | 0.76 (0.51- 1.12)  | 0.161  |     |
| <b>Conditioning</b>                       |                    |        |     |
| MAC                                       | Ref                | Ref    |     |
| RIC                                       | 1.22 (0.79- 1.98)  | 0.367  |     |
| <b>ATG</b>                                |                    |        |     |
| Not given                                 | Ref                | Ref    |     |
| given                                     | 0.92 (0.66 – 1.27) | 0.608  |     |
| <b>Recipient sex</b>                      |                    |        |     |
| Female                                    | Ref                | Ref    |     |
| Male                                      | 0.88 (0.64- 1.20)  | 0.416  |     |
| <b>Donor sex</b>                          |                    |        |     |
| Female                                    | Ref                | Ref    |     |
| Male                                      | 0.90 (0.65- 1.24)  | 0.512  |     |

Significance code: '\*\*\*\*'  $p < 0.001$ ; '\*\*\*'  $p < 0.01$ ; '\*\*'  $p < 0.05$ ; '.'  $p < 0.1$ ; + According to Gratwohl et al., 2009 [51]. Abbreviations: SIG-significance; HR-hazard ratio; HLA-human leukocyte antigen; RIC-reduced intensity conditioning; MAC-Myeloablative conditioning; ATG-anti-thymocyte globulin; CR – complete remission before alloSCT.

**Supplementary Table S2.** Multivariate Cox regression analysis with endpoint to time to relapse (TTR) in the full Heidelberg cohort including interaction term of disease entity and Leptin serum level.

|                                                     | HR (95% CI)        | P      | SIG |
|-----------------------------------------------------|--------------------|--------|-----|
| <b>Age at transplant (per 10 years)</b>             | 0.94 (0.83 -1.07)  | 0.344  |     |
| <b>Disease stage<sup>+</sup></b>                    |                    |        |     |
| CR1                                                 | Ref                | Ref    | *** |
| >CR1                                                | 2.99 (2.04- 4.37)  | <0.001 |     |
| <b>HLA match</b>                                    |                    |        |     |
| match (10/10)                                       | Ref                | Ref    |     |
| mismatch                                            | 0.78 (0.53- 1.15)  | 0.212  |     |
| <b>Conditioning</b>                                 |                    |        |     |
| MAC                                                 | Ref                | Ref    |     |
| RIC                                                 | 1.20 (0.78- 1.87)  | 0.406  |     |
| <b>ATG</b>                                          |                    |        |     |
| Not given                                           | Ref                | Ref    |     |
| given                                               | 0.92 (0.66 – 1.27) | 0.519  |     |
| <b>Recipient sex</b>                                |                    |        |     |
| Female                                              | Ref                | Ref    |     |
| Male                                                | 0.87 (0.64 – 1.19) | 0.416  |     |
| <b>Donor sex</b>                                    |                    |        |     |
| Female                                              | Ref                | Ref    |     |
| Male                                                | 0.90 (0.65- 1.24)  | 0.500  |     |
| <b>Leptin (log2) * disease entity (AML and ALL)</b> | 0.83 (0.71 -0.99)  | 0.033  | *   |
| <b>Leptin (log2) * disease entity (other)</b>       | 0.95 (0.84 – 1.09) | 0.480  |     |

Significance code: '\*\*\*\*'  $p < 0.001$ ; '\*\*\*'  $p < 0.01$ ; '\*\*'  $p < 0.05$ ; '.'  $p < 0.1$ ; \* According to Gratwohl et al., 2009 (21). Abbreviations: SIG-significance; HR-hazard ratio; HLA-human leukocyte antigen; RIC-reduced intensity conditioning; MAC-Myeloablative conditioning; ATG-anti-thymocyte globulin. CR – complete remission before alloSCT, AML, acute myeloid leukemia, ALL, acute lymphoid leukemia.

**Supplementary Table S3.** Multivariate Cox regression analysis with endpoint time to relapse (TTR) in Acute Leukemia patients, Heidelberg cohort.

|                                                                           | HR (95% CI)        | P     | SIG |
|---------------------------------------------------------------------------|--------------------|-------|-----|
| <b>Age at transplant (per 10 years)</b>                                   | 1.02 (0.85 -1.11)  | 0.825 |     |
| <b>HLA match</b>                                                          |                    |       |     |
| match (10/10)                                                             | Ref                | Ref   |     |
| mismatch                                                                  | 0.70 (0.39- 1.28)  | 0.251 |     |
| <b>Conditioning</b>                                                       |                    |       |     |
| MAC                                                                       | Ref                | Ref   |     |
| RIC                                                                       | 0.85 (0.50- 1.43)  | 0.530 |     |
| <b>ATG</b>                                                                |                    |       |     |
| Not given                                                                 | Ref                | Ref   |     |
| given                                                                     | 1.28 (0.74 – 2.21) | 0.378 |     |
| <b>Recipient sex</b>                                                      |                    |       |     |
| Female                                                                    | Ref                | Ref   |     |
| Male                                                                      | 0.91 (0.55 – 1.52) | 0.726 |     |
| <b>Donor sex</b>                                                          |                    |       |     |
| Female                                                                    | Ref                | Ref   | *   |
| Male                                                                      | 0.55 (0.32- 0.93)  | 0.027 |     |
| <b>Leptin (log2) x disease stage<sup>+</sup> (early)</b>                  | 0.85 (0.65 -1.12)  | 0.256 |     |
| <b>Leptin (log2) x disease stage<sup>+</sup> (intermediated/advanced)</b> | 0.79 (0.63 – 0.99) | 0.040 | *   |

Significance code: '\*\*\*'  $p < 0.001$ ; '\*\*'  $p < 0.01$ ; '\*'  $p < 0.05$ ; '.'  $p < 0.1$ ; + According to Gratwohl et al., 2009 (21). Abbreviations: SIG-significance; HR-hazard ratio; HLA-human leukocyte antigen; RIC-reduced intensity conditioning; MAC-Myeloablative conditioning; ATG-anti-thymocyte globulin.

**Supplementary Table S4.** Multivariate Cox regression analysis with endpoint time to relapse (TTR) in Acute Leukemia patients, Essen cohort, considering interaction of disease stage and Leptin serum level.

|                                                                          | <b>HR (95% CI)</b> | <b>p</b> | <b>SIG</b> |
|--------------------------------------------------------------------------|--------------------|----------|------------|
| <b>Age at transplant (per 10 years)</b>                                  | 1.00 (0.85 -1.18)  | 0.995    |            |
| <b>HLA match</b>                                                         |                    |          |            |
| match (10/10)                                                            | Ref                | Ref      |            |
| mismatch                                                                 | 1.34 (0.73-2.63)   | 0.163    |            |
| <b>Conditioning</b>                                                      |                    |          |            |
| MAC                                                                      | Ref                | Ref      |            |
| RIC                                                                      | 1.38 (0.73- 2.63)  | 0.320    |            |
| <b>ATG</b>                                                               |                    |          |            |
| Not given                                                                | Ref                | Ref      |            |
| given                                                                    | 0.85 (0.57 – 1.28) | 0.441    |            |
| <b>Donor sex</b>                                                         |                    |          |            |
| Female                                                                   | Ref                | Ref      |            |
| Male                                                                     | 0.79 (0.53- 1.18)  | 0.252    |            |
| <b>Recipient sex</b>                                                     |                    |          |            |
| Female                                                                   | Ref                |          |            |
| Male                                                                     | 1.01 (0.67-1.52)   | 0.973    |            |
| <b>Leptin (log2) x disease stage<sup>+</sup> (early)</b>                 | 1.02 (0.86 -1.21)  | 0.813    |            |
| <b>Leptin (log2) x disease stage<sup>+</sup> (intermediate/advanced)</b> | 0.83 (0.72 – 0.96) | 0.013    | *          |

Significance code: '\*\*\*'  $p < 0.001$ ; '\*\*'  $p < 0.01$ ; '\*'  $p < 0.05$ ; '.'  $p < 0.1$ ; + According to Gratwohl et al., 2009 (34). Abbreviations: SIG-significance; HR-hazard ratio; HLA-human leukocyte antigen; RIC-reduced intensity conditioning; MAC-Myeloablative conditioning; ATG-anti-thymocyte globulin.

**Supplementary Table S5. Multivariate Cox regression analysis including Adiponectin**

(n=85), with endpoint time to relapse (TTR) in intermediate/advanced Acute leukaemia (>CR1)<sup>#</sup>, training cohort

|                                         | HR (95% CI)      | P     | SIG |
|-----------------------------------------|------------------|-------|-----|
| Pre-conditioning Adiponectin (per log2) | 0.84 (0.60-1.19) | 0.331 |     |
| Pre-conditioning Leptin (per log2)      | 0.73 (0.57-0.95) | 0.018 | *   |
| Age at transplant (per 10 years)        | 1.02 (0.99-1.06) | 0.136 |     |
| HLA match                               |                  |       |     |
| match (10/10)                           | Ref              |       |     |
| mismatch                                | 1.05 (0.71-1.57) | 0.794 |     |
| Conditioning                            |                  |       |     |
| MAC                                     | Ref              |       |     |
| RIC                                     | 1.33 (0.66-2.69) | 0.427 |     |
| ATG                                     |                  |       |     |
| Not given                               | Ref              |       |     |
| given                                   | 0.62(0.27-1.44)  | 0.269 |     |
| Donor sex                               |                  |       |     |
| Female                                  | Ref              |       |     |
| Male                                    | 0.57 (0.27-1.44) | 0.164 |     |
| Recipient sex                           |                  |       |     |
| Female                                  | Ref              |       |     |
| Male                                    | 0.51 (0.25-1.05) | 0.069 |     |

Significance code: '\*\*\*'  $p < 0.001$ ; '\*\*'  $p < 0.01$ ; '\*'  $p < 0.05$ ; '.'  $p < 0.1$ , <sup>#</sup> According to Gratwohl et al., 2009 (34). Abbreviations: SIG-significance; HR-hazard ratio; HLA-human leukocyte antigen; RIC-reduced intensity conditioning; MAC-Myeloablative conditioning; ATG-anti-thymocyte globulin.

**Supplementary Table S6.** Multivariate Cox regression analysis **including BMI** (n=81), with endpoint time to relapse (TTR) in intermediate/advanced Acute leukaemia (>CR1)<sup>#</sup>, training cohort

|                                    | <i>HR (95% CI)</i> | <i>p</i> | <i>SIG</i> |
|------------------------------------|--------------------|----------|------------|
| BMI <22 kg/m <sup>2</sup>          | Ref                |          |            |
| BMI 22-29.9 kg/m <sup>2</sup>      | 0.62 (0.13-3.22)   | 0.591    |            |
| BMI ≥30 kg/m <sup>2</sup>          | 1.48 (0.55-3.97)   | 0.432    |            |
| Pre-conditioning Leptin (per log2) | 0.70 (0.51-0.98)   | 0.038    | *          |
| Age at transplant (per 10 years)   | 1.01 (0.98-1.05)   | 0.553    |            |
| HLA match                          |                    |          |            |
| match (10/10)                      | Ref                |          |            |
| mismatch                           | 1.24 (0.83-1.84)   | 0.286    |            |
| Conditioning                       |                    |          |            |
| MAC                                | Ref                |          |            |
| RIC                                | 1.46 (0.45-4.68)   | 0.527    |            |
| ATG                                |                    |          |            |
| Not given                          | Ref                |          |            |
| given                              | 0.31 (0.12-0.83)   | 0.019    | *          |
| Donor sex                          |                    |          |            |
| Female                             | Ref                |          |            |
| Male                               | 0.30 (0.11-0.80)   | 0.017    | *          |
| Recipient sex                      |                    |          |            |
| Female                             | Ref                |          |            |
| Male                               | 0.58 (0.24-1.42)   | 0.236    |            |

*Significance code: '\*\*\*\*' p< 0.001; '\*\*\*' p<0.01; '\*\*' p<0.05; '.' p<0.1, # According to Gratwohl et al., 2009 (34). Abbreviations: SIG-significance; HR-hazard ratio; HLA-human leukocyte antigen; RIC-reduced intensity conditioning; MAC-Myeloablative conditioning; ATG-anti-thymocyte globulin.*



**Supplementary Table S7.** *Multivariate Cox regression analysis with endpoints acute GvHD and acute GvHD grade 3+4 in Acute Leukemia patients (Heidelberg cohort).*

|                                           | Acute GvHD        |       | Acute GvHD grade 3+4 |       |
|-------------------------------------------|-------------------|-------|----------------------|-------|
|                                           | HR (95% CI)       | P     | HR (95% CI)          | P     |
| <b>Pre-conditioning Leptin (per log2)</b> | 0.94 (0.72 -1.22) | 0.630 | 0.88 (0.59 -1.33)    | 0.544 |
| <b>Age at transplant (per 10 years)</b>   | 0.93 (0.74 -1.19) | 0.579 | 1.22 (0.82 -1.83)    | 0.326 |
| <b>HLA match</b>                          |                   |       |                      |       |
| match (10/10)                             | Ref               | Ref   | Ref                  | Ref   |
| mismatch                                  | 1.15 (0.55 -2.42) | 0.706 | 2.29 (0.76 -6.89)    | 0.140 |
| <b>Conditioning</b>                       |                   |       |                      |       |
| MAC                                       | Ref               | Ref   | Ref                  | Ref   |
| RIC                                       | 0.35 (0.17 -0.70) | 0.003 | 0.26 (0.09 -0.77)    | 0.015 |
| <b>ATG pre transplant</b>                 |                   |       |                      |       |
| Not given                                 | Ref               | Ref   | Ref                  | Ref   |
| Given                                     | 0.58 (0.26 -1.28) | 0.177 | 0.43 (0.13 - 1.46)   | 0.176 |
| <b>Recipient sex</b>                      |                   |       |                      |       |
| Female                                    | Ref               | Ref   | Ref                  | Ref   |
| Male                                      | 0.58 (0.27 -1.24) | 0.160 | 0.81 (0.26 - 2.52)   | 0.717 |
| <b>Donor sex</b>                          |                   |       |                      |       |
| Female                                    | Ref               | Ref   | Ref                  | Ref   |
| Male                                      | 1.52 (0.65 -3.52) | 0.332 | 1.03 (0.33 - 3.26)   | 0.959 |

Significance code: '\*\*\*\*'  $p < 0.001$ ; '\*\*\*'  $p < 0.01$ ; '\*\*'  $p < 0.05$ ; '.'  $p < 0.1$ ; + According to Gratwohl et al., 2009 (34). Abbreviations: SIG-significance; HR-hazard ratio; HLA-human leukocyte antigen; RIC-reduced intensity conditioning; MAC-Myeloablative conditioning; ATG-anti-thymocyte globulin.

**Supplementary Table S8.** Multivariate Cox regression analysis with endpoints acute GvHD and acute GvHD grade 3+4 in Acute Leukemia patients (Essen cohort).

|                                           | Acute GvHD        |       | Acute GvHD grade 3+4 |         |
|-------------------------------------------|-------------------|-------|----------------------|---------|
|                                           | HR (95% CI)       | P     | HR (95% CI)          | P       |
| <b>Pre-conditioning Leptin (per log2)</b> | 1.13 (0.99 -1.27) | 0.052 | 1.00 (0.73 -1.37)    | 0.991   |
| <b>Age at transplant (per 10 years)</b>   | 1.00 (0.86 -1.16) | 0.988 | 0.97 (0.69 -1.37)    | 0.881   |
| <b>HLA match</b>                          |                   |       |                      |         |
| match (10/10)                             | Ref               | Ref   | Ref                  | Ref     |
| mismatch                                  | 1.14 (0.79 -1.65) | 0.486 | 0.92 (0.36 -2.37)    | 0.861   |
| <b>Conditioning</b>                       |                   |       |                      |         |
| MAC                                       | Ref               | Ref   | Ref                  | Ref     |
| RIC                                       | 0.84 (0.47 -1.49) | 0.544 | 4.18 (0.51 -34.28)   | 0.183   |
| <b>ATG pre transplant</b>                 |                   |       |                      |         |
| Not given                                 | Ref               | Ref   | Ref                  | Ref     |
| Given                                     | 0.91 (0.64 -1.29) | 0.588 | 0.33 (0.13 - 0.97)   | 0.024 * |
| <b>Recipient sex</b>                      |                   |       |                      |         |
| Female                                    | Ref               | Ref   | Ref                  | Ref     |
| Male                                      | 1.10 (0.74 -1.63) | 0.636 | 1.67 (0.67 - 4.17)   | 0.275   |
| <b>Donor sex</b>                          |                   |       |                      |         |
| Female                                    | Ref               | Ref   | Ref                  | Ref     |
| Male                                      | 0.82 (0.58 -1.17) | 0.281 | 0.64 (0.28 - 1.47)   | 0.290   |

Significance code: '\*\*\*'  $p < 0.001$ ; '\*\*'  $p < 0.01$ ; '\*'  $p < 0.05$ ; '.'  $p < 0.1$ ; + According to Gratwohl et al., 2009 (34). Abbreviations: SIG-significance; HR-hazard ratio; HLA-human leukocyte antigen; RIC-reduced intensity conditioning; MAC-Myeloablative conditioning; ATG-anti-thymocyte globulin.

**Supplementary Table S9.** *Multivariate Cox regression analysis with endpoint mild chronic GvHD and severe chronic GvHD in Acute Leukemia patients (Heidelberg cohort).*

|                                           | Mild chronic GvHD |            | Severe chronic GvHD |         |
|-------------------------------------------|-------------------|------------|---------------------|---------|
|                                           | HR (95% CI)       | P          | HR (95% CI)         | P       |
| <b>Pre-conditioning Leptin (per log2)</b> | 1.10 (0.90-1.33)  | 0.373      | 1.06 (0.76-1.48)    | 0.721   |
| <b>Age at transplant (per 10 years)</b>   | 1.01 (0.82-1.25)  | 0.919      | 0.67 (0.47-0.94)    | 0.023 * |
| <b>Disease stage<sup>+</sup></b>          |                   |            |                     |         |
| Early                                     | Ref               | Ref        | Ref                 | Ref     |
| Intermediate/Advanced                     | 1.14 (0.66-1.97)  | 0.650      | 0.81 (0.31-2.15)    | 0.682   |
| <b>HLA match</b>                          |                   |            |                     |         |
| match (10/10)                             | Ref               | Ref        | Ref                 | Ref     |
| mismatch                                  | 0.51 (0.23-1.15)  | 0.104      | 0.89(0.26-3.07)     | 0.857   |
| <b>Conditioning</b>                       |                   |            |                     |         |
| MAC                                       | Ref               | Ref        | Ref                 | Ref     |
| RIC                                       | 1.01(0.54-1.90)   | 0.966      | 2.16 (0.69-6.74)    | 0.186   |
| <b>ATG pre transplant</b>                 |                   |            |                     |         |
| Not given                                 | Ref               | Ref        | Ref                 | Ref     |
| given                                     | 0.35 (0.20-0.60)  | <0.001 *** | 0.43 (0.17-1.13)    | 0.087 . |
| <b>Recipient sex</b>                      |                   |            |                     |         |
| Female                                    | Ref               | Ref        | Ref                 | Ref     |
| Male                                      | 1.18 (0.68-2.05)  | 0.553      | 0.92 (0.37-2.31)    | 0.863   |
| <b>Donor sex</b>                          |                   |            |                     |         |
| Female                                    | Ref               | Ref        | Ref                 | Ref     |
| Male                                      | 0.65 (0.37-1.16)  | 0.145      | 0.82 (0.31-2.15)    | 0.859   |

Significance code: '\*\*\*'  $p < 0.001$ ; '\*\*'  $p < 0.01$ ; '\*'  $p < 0.05$ ; '.'  $p < 0.1$ ; + According to Gratwohl et al., 2009 (34). Abbreviations: SIG-significance; HR-hazard ratio; HLA-human leukocyte antigen; RIC-reduced intensity conditioning; MAC-Myeloablative conditioning; ATG-anti-thymocyte globulin.

**Supplementary Table S10.** Patient characteristics of the full Heidelberg cohort (discovery cohort).

|                                                                                                         |                           |
|---------------------------------------------------------------------------------------------------------|---------------------------|
| <b>n</b>                                                                                                | 524                       |
| <b>Year alloSCT performed</b>                                                                           | 2002-2013                 |
| <b>Median Age at alloSCT (range)</b>                                                                    | 54 (17 to 75)             |
| <b>Recipient Sex</b>                                                                                    |                           |
| Female                                                                                                  | 205 (39%)                 |
| Male                                                                                                    | 319 (61%)                 |
| <b>Donor Sex</b>                                                                                        |                           |
| Female                                                                                                  | 168 (32%)                 |
| Male                                                                                                    | 356 (68%)                 |
| <b>Disease entity</b>                                                                                   |                           |
| AML                                                                                                     | 161 (31%)                 |
| ALL                                                                                                     | 45 (9%)                   |
| Other                                                                                                   | 318 (61%)                 |
| <b>HLA match</b>                                                                                        |                           |
| Match (10/10)                                                                                           | 400 (76%)                 |
| Mismatch                                                                                                | 124 (24%)                 |
| <b>Conditioning</b>                                                                                     |                           |
| MAC                                                                                                     | 90 (17%)                  |
| RIC                                                                                                     | 434 (83%)                 |
| <b>Pre-transplant ATG</b>                                                                               |                           |
| Given                                                                                                   | 340 (65%)                 |
| Not given                                                                                               | 184 (35%)                 |
| <b>Disease stage before alloSCT<sup>+</sup></b>                                                         |                           |
| CR1                                                                                                     | 157 (30%)                 |
| CR2                                                                                                     | 133 (25%)                 |
| >CR2                                                                                                    | 215 (41%)                 |
| unknown                                                                                                 | 19 (4%)                   |
| <b>Serum Leptin Median in pg/ml (range)</b>                                                             | 14,241 (529.56 to 97,994) |
| <b>Serum Adiponectin Median in ng/ml (range)</b>                                                        | 4,485.1 (747.9-20,000)    |
| <b>Serum Vitamin D Median in ng/ml (range)</b>                                                          | 11.9 (1 to 46.3)          |
| <b>Body Mass Index Median in kg/m<sup>2</sup></b>                                                       | 24.7 (16.3 to 47.6)       |
| <b>% Change in Body weight 3 months prior to alloSCT compared to transplantation day Median (range)</b> | -1.2 (-19.3 to 26.1)      |

<sup>+</sup> According to Gratwohl et al., 2009 (21). Abbreviations: HLA, human leukocyte antigen; RIC, reduced intensity conditioning; MAC, Myeloablative conditioning; ATG, anti-thymocyte globulin. CR- complete remission before alloSCT

**Supplementary Table S11.** Patient characteristics of the full Essen cohort.

|                                                           |                       |
|-----------------------------------------------------------|-----------------------|
| <b>n</b>                                                  | 367                   |
| <b>Year alloSCT performed</b>                             | 2009-2013             |
| <b>Median Age at alloSCT (range)</b>                      | 55 (17 to 73)         |
| <b>Recipient Sex</b>                                      |                       |
| Female                                                    | 189 (51%)             |
| Male                                                      | 178 (49%)             |
| <b>Donor Sex</b>                                          |                       |
| Female                                                    | 122 (33%)             |
| Male                                                      | 245 (67%)             |
| <b>Disease entity</b>                                     |                       |
| AML                                                       | 367 (100%)            |
| <b>HLA match</b>                                          |                       |
| match (10/10)                                             | 262 (71%)             |
| mismatch                                                  | 105 (29%)             |
| <b>Conditioning</b>                                       |                       |
| MAC                                                       | 48 (13%)              |
| RIC                                                       | 319 (87%)             |
| <b>Pre-transplant ATG</b>                                 |                       |
| Given                                                     | 213 (58%)             |
| Not given                                                 | 154 (42%)             |
| <b>Disease stage before alloSCT<sup>+</sup></b>           |                       |
| CR1                                                       | 182 (50%)             |
| CR2                                                       | 97 (26%)              |
| >CR2                                                      | 88 (24%)              |
| <b>Serum Leptin Median in pg/ml (range)</b>               | 9564 (91.62 to 92219) |
| <b>Serum Vitamin D Median in ng/ml (range)</b>            | 10.3 (0 to 39.2)      |
| <b>Body mass index Median in kg/m<sup>2</sup> (range)</b> | 25.7 (17.5 to 47.1)   |

<sup>+</sup> According to Gratwohl et al., 2009 (21). Abbreviations: HLA-human leukocyte antigen; RIC-reduced intensity conditioning; MAC-Myeloablative conditioning; ATG-anti-thymocyte globulin. CR- complete remission before alloSCT
